# Supplementary material for: Green phosphorescent organic electroluminescent devices with 27.9% external quantum efficiency by employing a terbium complex as a co-dopant
Source: Royal Society of Chemistry journal article supplement (doi:10.1039/c9tc02215e), 2019-01-01
Supplement: c9tc02215e1.pdf [file c9tc02215e1.pdf]

### Supporting Information

TITLE: Green Phosphorescent Organic Electroluminescent Devices with 27.9%  
External Quantum Efficiency by Employing Terbium Complex as Co-dopant

Rongzhen Cui <sup>a</sup>, Weiqiang Liu <sup>a</sup>, Liang Zhou <sup>a,\*</sup>, Xuesen Zhao <sup>a</sup>, Yunlong Jiang <sup>a</sup>,  
Yingjie Cui <sup>a</sup>, Qi Zhu <sup>a</sup>, Youxuan Zheng <sup>b,\*</sup> and Hongjie Zhang <sup>a</sup>

<sup>a</sup> *State Key Laboratory of Rare Earth Resource Utilization, Changchun Institute of Applied Chemistry, Chinese Academy of Sciences, Changchun 130022, People's Republic of China*

<sup>b</sup> *State Key Laboratory of Coordination Chemistry, Collaborative Innovation Center of Advanced Microstructures, School of Chemistry and Chemical Engineering, Nanjing University, Nanjing 210023, People's Republic of China*

---

\* Correspondence to: State Key Laboratory of Rare Earth Resource Utilization, Changchun Institute of Applied Chemistry, Chinese Academy of Sciences, Renmin Street 5625, Changchun 130022, People's Republic of China. Tel.: +86 431 852628557; fax: +86 431 85698041.  
*E-mail address:* zhoul@ciac.ac.cn (L. Zhou), yxzheng@nju.edu.cn (Y. Zheng).

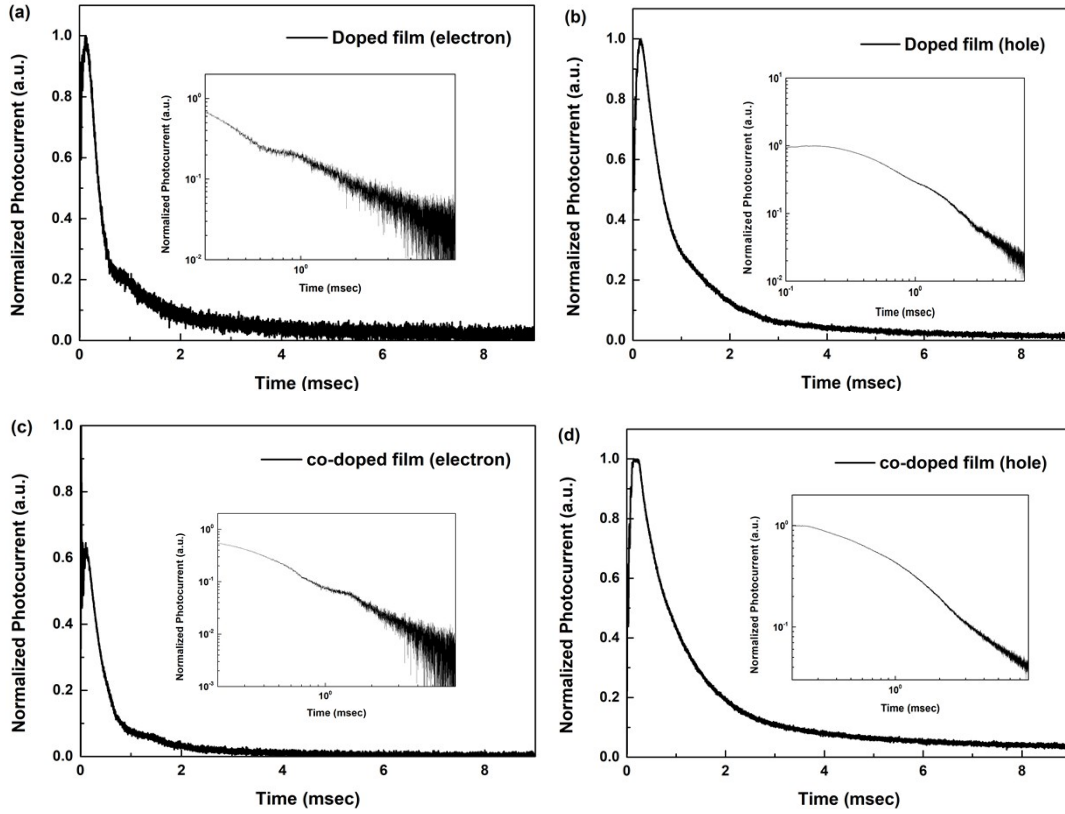

**Figure S1.** Typical transient photocurrent signals for the electron of doped film (a), the hole of doped film (b), the electron of co-doped film (c) and the hole of doped film (d).
